# Supplementary material for: Carotid artery endarterectomy in patients with symptomatic non-stenotic carotid artery disease
Source: HighWire-hosted journal article supplement (doi:10.1136/svn-2021-000939), 2022-03-03
Supplement: svn-2021-000939supp001_data_supplement.pdf [file svn-2021-000939supp001_data_supplement.pdf]

**Supplemental Table 1. Baseline patient characteristics at the time of CEA**

|                                               | <b>Carotid Mild (&lt;50%)<br/>Stenosis (N=32)</b> |
|-----------------------------------------------|---------------------------------------------------|
| Age (years)                                   | 72.0 (65.5-76.0)                                  |
| Female - no. (%)                              | 8 (25.0)                                          |
| BMI (kg/m <sup>2</sup> )                      | 30.0 ± 4.4                                        |
| Systolic blood pressure (mmHg)                | 133.5 ± 19.1                                      |
| Diastolic blood pressure (mmHg)               | 71.7 ± 12.3                                       |
| <i>Cardiovascular risk factors</i>            |                                                   |
| Smoking history - no. (%)                     | 20 (62.5)                                         |
| Hyperlipidemia - no. (%)                      | 27 (84.3)                                         |
| Hypertension - no. (%)                        | 27 (84.3)                                         |
| Diabetes mellitus - no. (%)                   | 8 (25.0)                                          |
| <i>Laboratory parameters</i>                  |                                                   |
| Haemoglobin (g/dL)                            | 13.6 (12.4-14.2)                                  |
| White blood cell count (x 10 <sup>9</sup> /L) | 6.9 (5.9-8.6)                                     |
| Glucose (mg/dL)                               | 105.5 (96.2-132.5)                                |
| Hb A1C (%)                                    | 5.9 (5.4-6.6)                                     |
| Creatinine (mg/dL)                            | 1.0 (0.8-1.1)                                     |
| Total cholesterol (mg/dL)                     | 148.5 (135.0-177.5)                               |
| LDL cholesterol (mg/dL)                       | 78.5 (64.7-106.2)                                 |
| HDL cholesterol (mg/dL)                       | 43.0 (36.7-56.0)                                  |

|                                                                                            |                    |
|--------------------------------------------------------------------------------------------|--------------------|
| Triglycerides (mg/dL)                                                                      | 122.0 (78.0-162.5) |
| Uric acid (mg/dL)                                                                          | 6.2 (4.3-7.2)      |
| hs-CRP (mg/L)                                                                              | 2.2 (0.4-22.4)     |
| <i>Cardiovascular history</i>                                                              |                    |
| Ischemic stroke - no. (%)                                                                  | 18 (56.2)          |
| TIA - no. (%)                                                                              | 9 (28.1)           |
| Amaurosis fugax - no. (%)                                                                  | 5 (15.6)           |
| Recurrent ischemic cerebrovascular events related to ipsilateral carotid disease - no. (%) | 23 (71.8)          |
| Number of recurrent events/patient                                                         | 4 (3-5)            |
| Time between cerebrovascular ischemic event and CEA (days)                                 | 39.0 (6.0-124.0)   |
| Time between cerebrovascular ischemic event and CEA ≤6 mo. -no. (%)                        | 26.0 (81.2 )       |
| <i>Medications at the surgical evaluation</i>                                              |                    |
| Antiplatelet therapy - no. (%)                                                             | 32 (100)           |
| Monotherapy antiplatelet - no. (%)                                                         | 17 (53.1)          |
| Dual/triple antiplatelet therapy - no. (%)                                                 | 15 (46.8)          |
| Aspirin - no. (%)                                                                          | 30 (93.7)          |
| Clopidogrel - no. (%)                                                                      | 16 (50.0)          |
| Warfarin - no. (%) <sup>a</sup>                                                            | 2 (6.2)            |

|                                  |           |
|----------------------------------|-----------|
| Statin - no. (%)                 | 25 (78.1) |
| B-blocker - no. (%)              | 13 (40.6) |
| ACE-inhibitor - no. (%)          | 6 (18.7)  |
| Ca-channel blocker - no. (%)     | 3 (9.3)   |
| AT II-receptor blocker - no. (%) | 8 (25.0)  |
| Diuretic - no. (%)               | 7 (21.8)  |
| Nitrate - no. (%)                | 5 (15.6)  |
| Allopurinol - no. (%)            | 1 (3.1)   |

<sup>a</sup>Two patients were on Warfarin due to recurrent strokes prior to CEA. These patients were treated prior to the results of the RESPECT-ESUS and NAVIGATE ESUS trials.[1, 2]

Values are presented as means (standard deviations) or median (interquartile range) for continuous variables and percentages for dichotomous or categorical variables.

BMI, body mass index; Hb A1C, hemoglobin A1C; LDL, low-density lipoprotein; HDL, high-density lipoprotein; hs-CRP, high-sensitivity C-reactive protein; TIA, transient ischemic attack; CEA, carotid endarterectomy; ACE-inhibitor, angiotensin-converting enzyme-inhibitors; Ca-channel, Calcium-channel; AT II-receptor blocker, angiotensin II-receptor blocker; RESPECT-ESUS, Randomized, Double-Blind, Evaluation in Secondary Stroke Prevention Comparing the Efficacy and Safety of the Oral Thrombin Inhibitor Dabigatran Etexilate Versus Acetylsalicylic Acid in Patients With Embolic Stroke of Undetermined Source; NAVIGATE-ESUS, New Approach Rivaroxaban Inhibition of Factor Xa in a Global Trial versus ASA to Prevent Embolism in Embolic Stroke of Undetermined Source

## References

1. Hart RG, Sharma M, Mundl H, et al. Rivaroxaban for Stroke Prevention after Embolic Stroke of Undetermined Source. *N Engl J Med* 2018;378(23):2191-201. doi: 10.1056/NEJMoa1802686 [published Online First: 2018/05/17]
2. Diener HC, Sacco RL, Easton JD, et al. Antithrombotic Treatment of Embolic Stroke of Undetermined Source: RE-SPECT ESUS Elderly and Renally Impaired Subgroups. *Stroke* 2020;51(6):1758-65. doi: 10.1161/STROKEAHA.119.028643 [published Online First: 2020/05/15]
